# Supplementary material
Source: HighWire-hosted journal article supplement (http://jneurosci.org/highwire/filestream/599447/field_highwire_adjunct_files/5/table_4.pdf)
Supplement: table_4.pdf [file table_4.pdf]

| <b>Effect</b>         | <b>Type</b>       | <b>F</b>           | <b>p</b> |
|-----------------------|-------------------|--------------------|----------|
| aMTT: Past vs. Now    | Scheffe Post-hocs |                    | 0.93     |
| aMTT: Past vs. Future | Scheffe Post-hocs |                    | 0.03     |
| aMTT: Now vs. Future  | Scheffe Post-hocs |                    | 0.05     |
| rMTT - Past:          | Scheffe Post-hocs |                    | 0.98     |
| rMTT- Now:            | Scheffe Post-hocs |                    | 0.85     |
| rMTT - Future:        | Scheffe Post-hocs |                    | 0.78     |
| <b>GFP</b>            |                   |                    |          |
| aMTT                  | Main effect       | $F_{(2,26)} = 4.2$ | 0.02     |
| rMTT                  | Main effect       | $F_{(1,13)} = 0.9$ | 0.36     |
| aMTT $\times$ rMTT    | Interaction       | $F_{(2,26)} = 1.0$ | 0.35     |
| Self                  | Main effect       | $F_{(1,13)} = 1.2$ | 0.29     |

Supplementary Table 4. Statistical results and post-hoc tests for Future-map.
